# Supplementary material
Source: PubMed Central journal article supplement (PMC2849251)
Supplement: supp_76_7_2129__1.pdf [file supp_76_7_2129__1.pdf]

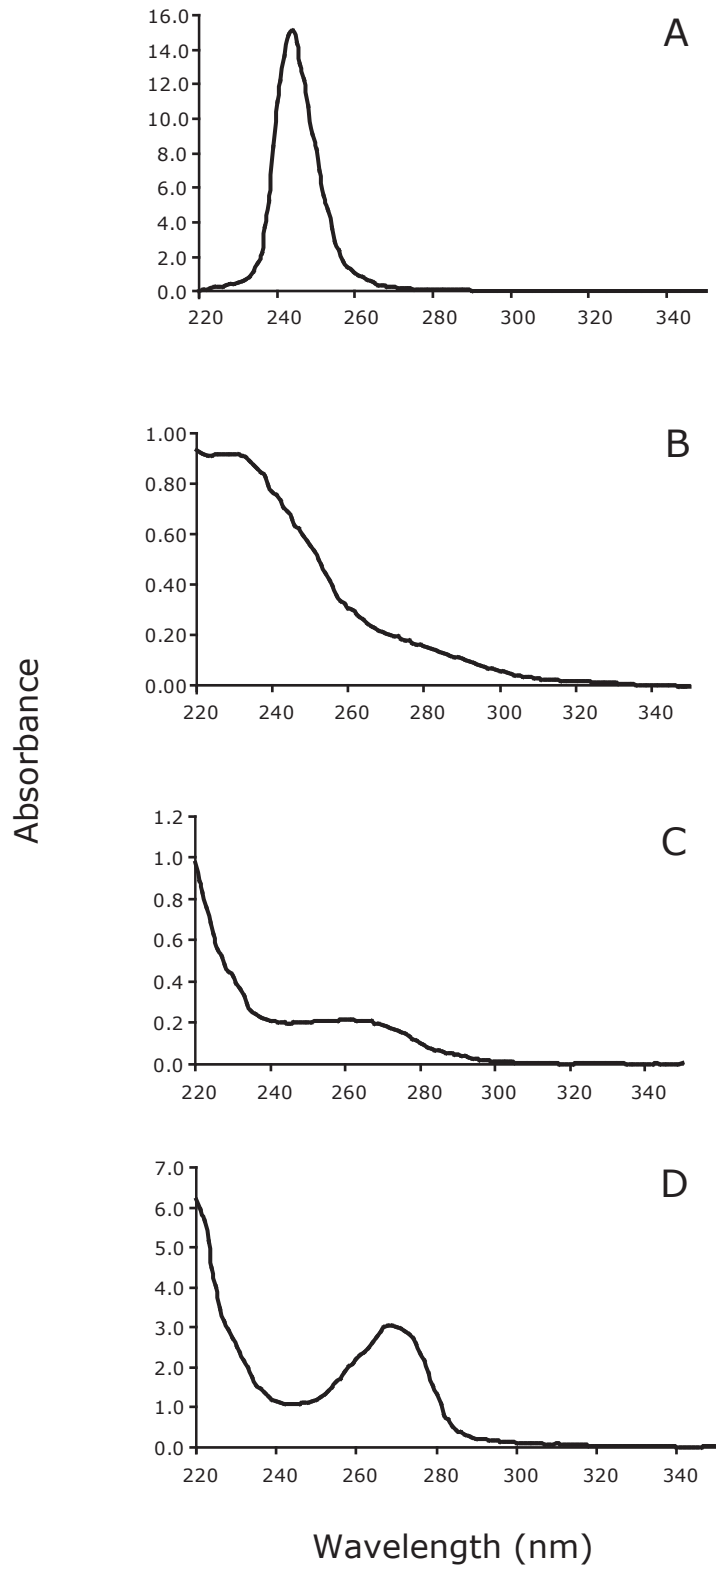

Figure S1.  
Representative uv spectra of DNA samples extracted using the Fast DNA SPIN Kit for Soil (A), UltraClean Soil DNA Kit (B), standard phenol/chloroform extraction (C) and modified phenol/chloroform extraction method (D)
